# Supplementary material for: Short hairpin RNA–expressing bacteria elicit RNA interference in mammals
Source: Springer Nature journal article supplement (doi:10.1038/nbt1211), 2006-05-14
Supplement: nbt1211-S1.pdf [file nbt1211-S1.pdf]

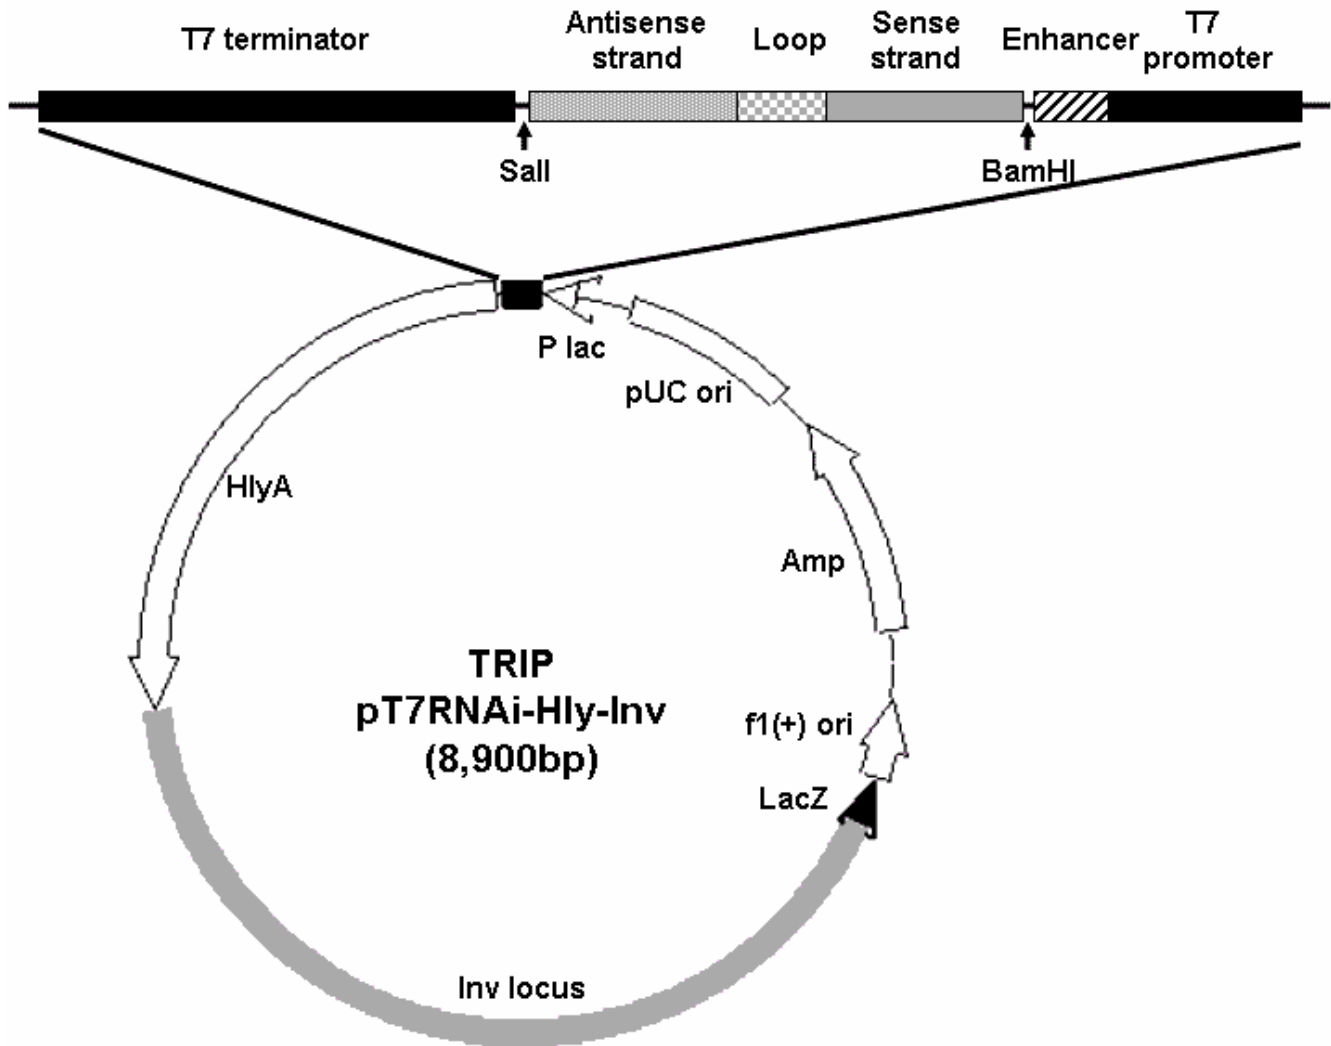

|                        |                                                                          |
|------------------------|--------------------------------------------------------------------------|
| T7 promoter:           | TAATACGACTCACTATAG                                                       |
| Enhancer:              | GAGACAGG                                                                 |
| T7 terminator:         | TAGCATAACCCCTTGGGGCCTCTAAACGGGTCTTGAGGGGTTTTTG                           |
| Loop:                  | TTCAAGAGA                                                                |
| Human $\beta$ -catenin | ggATCC AGCTGATATTGATGGACAG <u>TTCAAGAGA</u> CTGTCCATCAATATCAGCT TTgTCgAC |
| Mouse $\beta$ -catenin | ggATCC GGTGGTAGTTAATAAAGCT <u>TTCAAGAGA</u> AGCTTTATTAACCACC TTgTCgAC    |
| Human k-Ras (V12G)     | ggATCC GTTGGAGCTGTTGGCGTAG <u>TTCAAGAGA</u> CTACGCCAACAGCTCCAAC TTgTCgAC |

### Supplementary Figure 1:

Structure of Transkingdom RNA Interference Plasmid (TRIP) and silencing sequences
