# Supplementary material for: Short hairpin RNA–expressing bacteria elicit RNA interference in mammals
Source: Springer Nature journal article supplement (doi:10.1038/nbt1211), 2006-05-14
Supplement: nbt1211-S2.pdf [file nbt1211-S2.pdf]

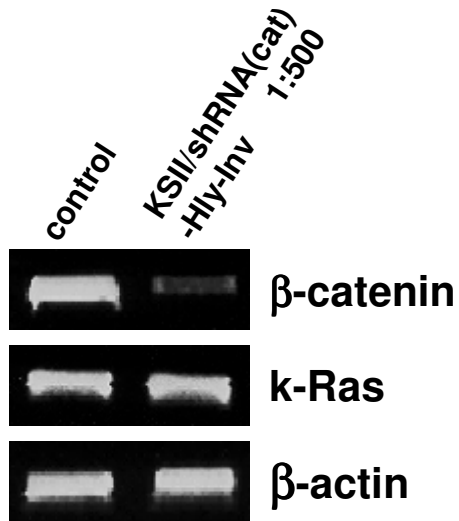

**Supplementary Figure 2:**

The  *$\beta$ -catenin* mRNA in SW480 cells was specifically knocked down while *K-ras* and  *$\beta$ -actin* were not affected as determined by RT-PCR.
