# Supplementary material for: Short hairpin RNA–expressing bacteria elicit RNA interference in mammals
Source: Springer Nature journal article supplement (doi:10.1038/nbt1211), 2006-05-14
Supplement: nbt1211-S3.pdf [file nbt1211-S3.pdf]

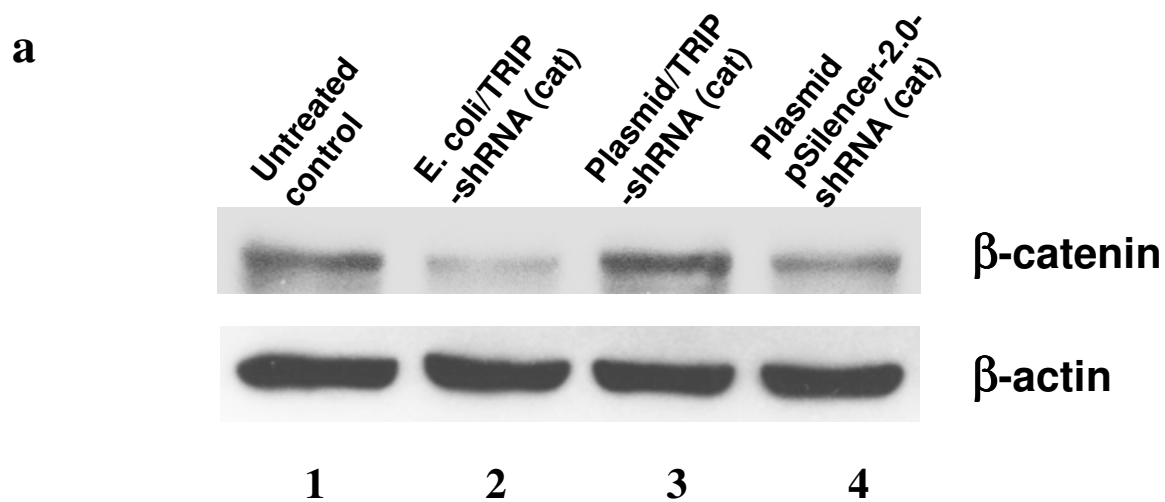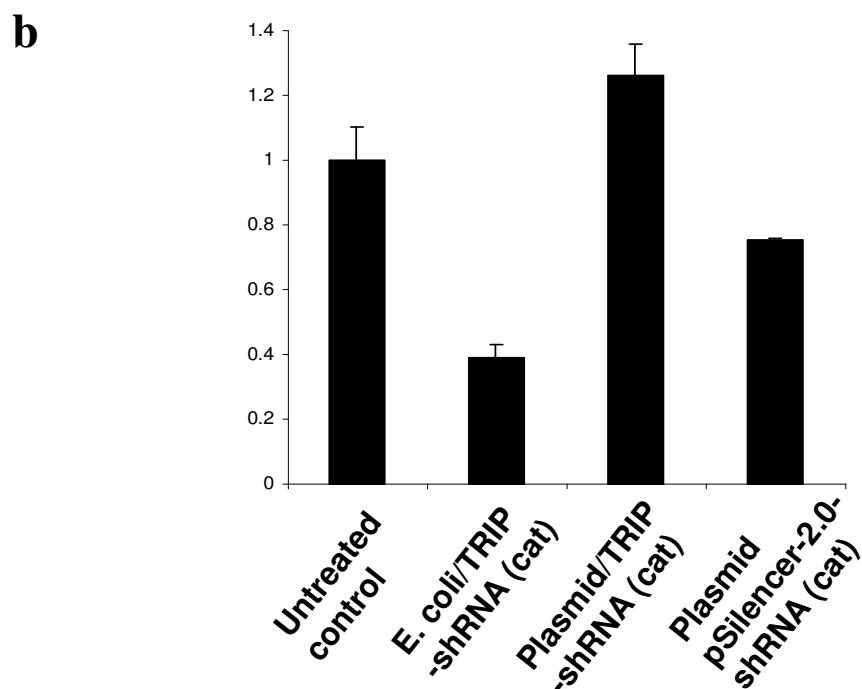

**Supplementary Figure 3.**  $\beta$ -catenin-silencing was induced by shRNA made by bacteria, not by mammalian cells. Results shown at protein levels (western blot) (a) and mRNA levels (Real-time PCR) (b)

SW 480 cells were treated with *E. coli* expressing shRNA against  $\beta$ -catenin (lane 2), or were transfected with 10  $\mu$ g of TRIP DNA encoding shRNA against  $\beta$ -catenin under the T7 promoter (lane 3) or 10  $\mu$ g of a plasmid (pSilencer2.0, Ambion) encoding the same hairpin RNA under a mammalian U6 promoter (lane 4), or 10  $\mu$ g of a control plasmid (lane 1). Transfection was performed with lipofectamine 2000 according to the manufacturer's instruction (Invitrogen). Cells were harvested at 48h.  $\beta$ -catenin protein expression was examined by Western blot, and the mRNA expression was analyzed by quantitative real-time PCR. Real-time PCR primers for  $\beta$ -catenin: AGCTCTTACACCCACCATCCC, GGACAAAGGGCAAGATTTTCG, Taqman probe: CTGGCCTCTGATAAAGGCTACTGTTGGATTGA
