# Supplementary material for: Short hairpin RNA–expressing bacteria elicit RNA interference in mammals
Source: Springer Nature journal article supplement (doi:10.1038/nbt1211), 2006-05-14
Supplement: nbt1211-S5.pdf [file nbt1211-S5.pdf]

## Quantification of marker genes for interferon response assay

|                                        | <u>24h</u> |         | <u>48h</u> |         | <u>72 h</u> |         |
|----------------------------------------|------------|---------|------------|---------|-------------|---------|
|                                        | Control    | Treated | Control    | Treated | Control     | Treated |
| <b><i>OAS1</i></b>                     | 1.00       | 1.22    | 1.00       | 0.95    | 1.00        | 0.99    |
| <b><i>ISGF3<math>\gamma</math></i></b> | 1.00       | 1.01    | 1.00       | 1.33    | 1.00        | 1.19    |
| <b><i>MX1</i></b>                      | 1.00       | 1.34    | 1.00       | 1.00    | 1.00        | 1.05    |
| <b><i>Actin</i></b>                    | 1.00       | 1.02    | 1.00       | 0.87    | 1.00        | 1.08    |
| <b><i>IFITM1</i></b>                   | 1.00       | 0.76    | 1.00       | 0.76    | 1.00        | 0.77    |

**Supplementary Table 1.** RT-PCR for marker genes of interferon pathway induction. RT-PCR (27 Cycles) bands were quantified using ImageJ software (NIH). No increase or decrease greater than 0.34 fold is seen in any of the five marker genes at any of the three time points assayed. Typical interferon-induced changes would range from 10-fold to 100-fold increases
